# Supplementary material
Source: MDPI journal article supplement (https://www.mdpi.com/2673-8430/2/2/22)
Supplement: s1 [file s1]

Supplementary Table S1

English ICD 10 Codes and ICD-codes used in the Germain guideline “specific back pain”

| German guideline “specific back pain” |                                                                                                                                                                                                                                                                                                                                                    | English ICD -Codes, version 2016 |                                                                                                                                                                       |
|---------------------------------------|----------------------------------------------------------------------------------------------------------------------------------------------------------------------------------------------------------------------------------------------------------------------------------------------------------------------------------------------------|----------------------------------|-----------------------------------------------------------------------------------------------------------------------------------------------------------------------|
|                                       | lumbar facet syndrome / spondylarthrosis                                                                                                                                                                                                                                                                                                           | M47                              | Spondylosis<br>Incl.: arthrosis or osteoarthritis of spine<br>degeneration of facet joints                                                                            |
| M47.26                                | Chronisches lumbales Facettensyndrom<br>(chronic lumbar facet-syndrome)<br>Degeneratives lumbales Facettensyndrom<br>(degenerative lumbar facet-syndrome)<br>Facettenreizung im LWS-Bereich<br>(facet irritation in lumbar spine)<br>Lumbales Facettensyndrom<br>(lumbar facet syndrome)<br>LWS-Facettenreizung<br>(lumbar spine facet irritation) | M47.26                           | Other spondylosis with radiculopathy,<br>lumbar region                                                                                                                |
| M47.27                                | Akutes lumbosakrales Facettensyndrom<br>(acute lumbarsacral facet-syndrome)<br>Chronisches Facettensyndrom L5/S1<br>(chronic facet-syndrome L5/S1)<br>Lumbosakrales Facettensyndrom<br>(lumbarsacral facet-syndrome)<br>Lumbosakrales Facettensyndrom mit<br>Blockierung (lumbarsacral facet-<br>syndrome with blockage)                           | M47.27                           | Other spondylosis with radiculopathy,<br>Lumbosacral region                                                                                                           |
| M47.29                                | Facettensyndrom<br>(facet syndrome)                                                                                                                                                                                                                                                                                                                | M47.29                           | Other spondylosis with radiculopathy, site<br>unspecified                                                                                                             |
| M47.87                                | Lumbosakrale Facettenarthrose<br>(lumbarsacral facet—arthrosis)                                                                                                                                                                                                                                                                                    | M47.87                           | Lumbosacral spondylosis, without<br>myelopathy or radiculopathy                                                                                                       |
| M47.99                                | Degeneratives Facettensyndrom<br>(degenerative facet-syndrome)                                                                                                                                                                                                                                                                                     | M47.99                           | Spondylosis, unspecified, site unspecified                                                                                                                            |
| M54.5                                 | Akute Lumbalgie mit Facettenreizung<br>(acute low back pain with facet-irritation)<br>Lumbalgie mit Facettenreizung<br>(low back pain with facet-irritation)                                                                                                                                                                                       | <b>M54.5</b>                     | <b>Low back pain</b><br>Loin pain<br>Low back strain<br>Lumbago NOS<br>Excl.: lumbago:<br>due to intervertebral disc displacement<br>(M51.2)<br>with sciatica (M54.4) |
| M47.86                                | Spondylarthrose der Lendenwirbelsäule<br>(spondylarthrosis in the lumbar spine)                                                                                                                                                                                                                                                                    | M47.86                           | Lumbar spondylosis, without myelopathy<br>or radiculopathy                                                                                                            |
| M47.88                                | Spondylarthrose in der Sakralgegend<br>((spondylarthrosis in the sacral region))                                                                                                                                                                                                                                                                   | M47.88                           | Sacral or sacrococcygeal spondylosis,<br>without myelopathy or radiculopathy                                                                                          |
| M47.99                                | Spondylarthrose<br>Spondylarthrosis<br>Spondylarthrosis deformans                                                                                                                                                                                                                                                                                  | M47.99                           | Spondylosis, unspecified, site unspecified                                                                                                                            |
